# Supplementary material
Source: PubMed Central journal article supplement (PMC3974265)
Supplement: NIHMS553256-supplement-supplement_1.pdf [file NIHMS553256-supplement-supplement_1.pdf]

**Appendix eTable 1: Relationship between labeled and unlabeled test choice- balance sheet group (n=302)**

|                      | Unlabeled test choice |     | Totals     |
|----------------------|-----------------------|-----|------------|
|                      | No PSA                | PSA |            |
| Labelled test choice |                       |     |            |
| No PSA               | 84                    | 20  | 104        |
| PSA                  | 86                    | 112 | 198        |
| Totals               | 170                   | 132 | <b>302</b> |

**Appendix eTable 2: Relationship between highest ranked attribute and most important attribute from single post-task question (n=307)**

|                          | Most important attribute – single post-task question |           |        |                          | Totals     |
|--------------------------|------------------------------------------------------|-----------|--------|--------------------------|------------|
|                          | Incidence                                            | Mortality | Biopsy | Impotence / Incontinence |            |
| Highest ranked attribute |                                                      |           |        |                          |            |
| Incidence                | 41                                                   | 21        | 7      | 4                        | 73         |
| Mortality                | 18                                                   | 129       | 8      | 7                        | 162        |
| Biopsy                   | 7                                                    | 10        | 9      | 3                        | 29         |
| Impotence / Incontinence | 3                                                    | 7         | 3      | 30                       | 43         |
| Totals                   | 69                                                   | 167       | 27     | 44                       | <b>307</b> |

**Appendix eTable 3: Mean utilities from DCE**

| <b>Attribute - Level</b>                                                | <b>Mean utility (95%CI)</b> | <b>% respondents ranked first</b> |
|-------------------------------------------------------------------------|-----------------------------|-----------------------------------|
| Chance of death from prostate cancer                                    |                             | 53.5%                             |
| 2 in 1000                                                               | 3.0407 (2.8379 , 3.1525)    |                                   |
| 3 in 1000                                                               | -1.0091 (-1.1306 , -0.9422) |                                   |
| 4 in 1000                                                               | -2.0316 (-2.1698 , -1.955)  |                                   |
|                                                                         |                             |                                   |
| Chance of diagnosis                                                     |                             | 20.8%                             |
| 40 in 1000                                                              | 2.4736 (2.1732, 2.6392)     |                                   |
| 60 in 1000                                                              | -0.7295 (-0.8850, -0.6438)  |                                   |
| 80 in 1000                                                              | -1.7441 (-1.9240, -1.6450)  |                                   |
|                                                                         |                             |                                   |
| Chance of requiring a biopsy as a result of screening                   |                             | 15.8%                             |
| 0 in 1000                                                               | 1.3672 (1.0659 , 1.5332)    |                                   |
| 240 in 1000                                                             | -0.8259 (-0.9887 , -0.7362) |                                   |
| 330 in 1000                                                             | -0.5413 (-0.7376 , -0.4331) |                                   |
|                                                                         |                             |                                   |
| Chance of developing impotence or incontinence as a result of screening |                             | 9.9%                              |
| 0 in 1000                                                               | 2.6974 (2.4842 , 2.8148)    |                                   |
| 10 in 1000                                                              | -1.1706 (-1.2972 , -1.1008) |                                   |
| 20 in 1000                                                              | -1.5268 (-1.6391 , -1.4649) |                                   |
